# Supplementary material
Source: PubMed Central journal article supplement (PMC11521117)
Supplement: NIHMS1935266-supplement-1.pdf [file NIHMS1935266-supplement-1.pdf]

## Supplementary Materials

Effect of COVID-19. Two hundred and six of the visits in our central dataset were before the onset of COVID-19 in the US (defined as February 1, 2020), while 35 of the visits were after that date. All data gathered during the COVID-19 pandemic were collected after the child's social transition and therefore the mental health effects of COVID-19 could impact data after, but not before, social transition. In our sample for this paper, we had too little data collected during COVID-19 to meaningfully test for a COVID-19 impact. Therefore, we assessed whether COVID-19 was related to PROMIS scores from parents of *other* gender diverse youth collected by our lab.

Using the same July 1<sup>st</sup>, 2021 cutoff, we included data from the kids in the Trans Youth Project. Out of the 317 possible children to include, N = 178 had parent-reported PROMIS data before and after the onset of COVID (712 total visits at which internalizing data were reported). We use linear multi-level models with (a) a random intercept per participant and (b) COVID-19 as a visit-level fixed effect (contrast codes: pre-COVID = -0.5; COVID = 0.5). We see that internalizing symptoms, and especially depression, increased significantly after the start of the COVID-19 pandemic (Table S1). These analyses were conducted using the full short-form (not the age-adjusted scoring).

*Table S1. COVID-19 Impact in Longitudinal Youth Dataset*

| <b>Fixed Effects</b>  | <b>Anxiety</b>           |         | <b>Depression</b>        |         |
|-----------------------|--------------------------|---------|--------------------------|---------|
|                       | Estimates                | p       | Estimates                | p       |
| Intercept             | 51.73                    | < 0.001 | 51.24                    | < 0.001 |
| COVID                 | 1.41                     | 0.013   | 3.06                     | < 0.001 |
| <b>Random Effects</b> |                          |         |                          |         |
| $\sigma^2$            | 45.23                    |         | 36.56                    |         |
| $\tau_{00}$           | 47.90 <sub>subject</sub> |         | 28.43 <sub>subject</sub> |         |
| ICC                   | 0.51                     |         | 0.44                     |         |

|                                       |                        |                        |
|---------------------------------------|------------------------|------------------------|
| N                                     | 177 <sub>subject</sub> | 178 <sub>subject</sub> |
| Obs.                                  | 710                    | 712                    |
| R <sup>2</sup> : Margin. /<br>Condit. | 0.004 / 0.516          | 0.029 / 0.454          |

Transition Effect - Specific Model Results. We present a multiverse analysis of transition-related mental health change in this article's main text. Here, we include the model results for all models included in the main text and the Figure 1 Forest Plot.

*Table S2. Anxiety - Pre-COVID Visits - All Transitioners - Not Age Adjusted – Models A-C*

| <i>Predictors</i>                        | <b>Model A</b>           |                  |          | <b>Model B</b>           |                  |          | <b>Model C</b>           |                  |          |
|------------------------------------------|--------------------------|------------------|----------|--------------------------|------------------|----------|--------------------------|------------------|----------|
|                                          | <i>Estimates</i>         | <i>CI</i>        | <i>p</i> | <i>Estimates</i>         | <i>CI</i>        | <i>p</i> | <i>Estimates</i>         | <i>CI</i>        | <i>p</i> |
| Intercept                                | 54.34                    | 51.78 –<br>56.90 | <0.001   | 53.62                    | 50.54 –<br>56.70 | <0.001   | 54.60                    | 52.16 –<br>57.04 | <0.001   |
| Social<br>Transition<br>Status           | -1.78                    | -3.93 –<br>0.37  | 0.104    | -1.76                    | -3.91 –<br>0.38  | 0.107    | -3.50                    | -6.09 –<br>-0.92 | 0.008    |
| Gender                                   |                          |                  |          | -2.59                    | -8.73 –<br>3.55  | 0.400    |                          |                  |          |
| Age (linear)                             |                          |                  |          |                          |                  |          | 0.07                     | 0.01 –<br>0.13   | 0.022    |
| <b>Random Effects</b>                    |                          |                  |          |                          |                  |          |                          |                  |          |
| $\sigma^2$                               | 46.34                    |                  |          | 46.31                    |                  |          | 46.52                    |                  |          |
| $\tau_{00}$                              | 59.96 <sub>subject</sub> |                  |          | 60.56 <sub>subject</sub> |                  |          | 52.64 <sub>subject</sub> |                  |          |
| ICC                                      | 0.56                     |                  |          | 0.57                     |                  |          | 0.53                     |                  |          |
| N                                        | 45 <sub>subject</sub>    |                  |          | 45 <sub>subject</sub>    |                  |          | 45 <sub>subject</sub>    |                  |          |
| Obs.                                     | 193                      |                  |          | 193                      |                  |          | 193                      |                  |          |
| R <sup>2</sup> :<br>Margin. /<br>Condit. | 0.007 / 0.567            |                  |          | 0.018 / 0.575            |                  |          | 0.060 / 0.559            |                  |          |

Table S3. Anxiety - Pre-COVID Visits - All Transitioners - Not Age Adjusted – Models D-F

| <i>Predictors</i>                     | <b>Model D</b>           |                  |          | <b>Model E</b>           |                  |          | <b>Model F</b>           |                  |          |
|---------------------------------------|--------------------------|------------------|----------|--------------------------|------------------|----------|--------------------------|------------------|----------|
|                                       | <i>Estimates</i>         | <i>CI</i>        | <i>p</i> | <i>Estimates</i>         | <i>CI</i>        | <i>p</i> | <i>Estimates</i>         | <i>CI</i>        | <i>p</i> |
| Intercept                             | 54.17                    | 51.19 –<br>57.15 | <0.001   | 55.69                    | 53.06 –<br>58.31 | <0.001   | 55.27                    | 52.14 –<br>58.40 | <0.001   |
| Social Transition<br>Status           | -3.42                    | -6.02 –<br>-0.82 | 0.010    | -3.78                    | -6.36 –<br>-1.20 | 0.004    | -3.70                    | -6.30 –<br>-1.11 | 0.005    |
| Age (linear)                          | 0.07                     | 0.01 –<br>0.13   | 0.032    | 0.09                     | 0.02 –<br>0.15   | 0.007    | 0.08                     | 0.02 –<br>0.15   | 0.010    |
| Gender                                | -1.52                    | -7.46 –<br>4.41  | 0.607    |                          |                  |          | -1.47                    | -7.34 –<br>4.41  | 0.617    |
| Age (quadratic)                       |                          |                  |          | -0.00                    | -0.00 –<br>-0.00 | 0.043    | -0.00                    | -0.00 –<br>-0.00 | 0.044    |
| <b>Random Effects</b>                 |                          |                  |          |                          |                  |          |                          |                  |          |
| $\sigma^2$                            | 46.47                    |                  |          | 45.80                    |                  |          | 45.77                    |                  |          |
| $\tau_{00}$                           | 53.99 <sub>subject</sub> |                  |          | 51.57 <sub>subject</sub> |                  |          | 52.84 <sub>subject</sub> |                  |          |
| ICC                                   | 0.54                     |                  |          | 0.53                     |                  |          | 0.54                     |                  |          |
| N                                     | 45 <sub>subject</sub>    |                  |          | 45 <sub>subject</sub>    |                  |          | 45 <sub>subject</sub>    |                  |          |
| Obs.                                  | 193                      |                  |          | 193                      |                  |          | 193                      |                  |          |
| R <sup>2</sup> : Margin. /<br>Condit. | 0.064 / 0.567            |                  |          | 0.082 / 0.568            |                  |          | 0.085 / 0.575            |                  |          |

Table S4. Anxiety - Pre-COVID Visits - All Transitioners - Age Adjusted – Models A - C

| <i>Predictors</i>                     | <b>Model A</b>           |                  |          | <b>Model B</b>           |                  |          | <b>Model C</b>           |                  |          |
|---------------------------------------|--------------------------|------------------|----------|--------------------------|------------------|----------|--------------------------|------------------|----------|
|                                       | <i>Estimates</i>         | <i>CI</i>        | <i>p</i> | <i>Estimates</i>         | <i>CI</i>        | <i>p</i> | <i>Estimates</i>         | <i>CI</i>        | <i>p</i> |
| Intercept                             | 55.26                    | 52.81 –<br>57.72 | <0.001   | 54.71                    | 51.75 –<br>57.68 | <0.001   | 55.42                    | 52.99 –<br>57.85 | <0.001   |
| Social Transition<br>Status           | -3.18                    | -5.32 –<br>-1.04 | 0.004    | -3.16                    | -5.30 –<br>-1.02 | 0.004    | -4.19                    | -6.77 –<br>-1.61 | 0.002    |
| Gender                                |                          |                  |          | -2.00                    | -7.91 –<br>3.91  | 0.498    |                          |                  |          |
| Age (linear)                          |                          |                  |          |                          |                  |          | 0.04                     | -0.02 –<br>0.10  | 0.171    |
| <b>Random Effects</b>                 |                          |                  |          |                          |                  |          |                          |                  |          |
| $\sigma^2$                            | 46.15                    |                  |          | 46.13                    |                  |          | 46.37                    |                  |          |
| $\tau_{00}$                           | 54.36 <sub>subject</sub> |                  |          | 55.29 <sub>subject</sub> |                  |          | 51.96 <sub>subject</sub> |                  |          |
| ICC                                   | 0.54                     |                  |          | 0.55                     |                  |          | 0.53                     |                  |          |
| N                                     | 45 <sub>subject</sub>    |                  |          | 45 <sub>subject</sub>    |                  |          | 45 <sub>subject</sub>    |                  |          |
| Obs.                                  | 193                      |                  |          | 193                      |                  |          | 193                      |                  |          |
| R <sup>2</sup> : Margin. /<br>Condit. | 0.023 / 0.551            |                  |          | 0.030 / 0.559            |                  |          | 0.044 / 0.549            |                  |          |

Table S5. Anxiety - Pre-COVID Visits - All Transitioners - Age Adjusted – Models D - F

| <i>Predictors</i>                     | <b>Model D</b>           |                  |          | <b>Model E</b>           |                  |          | <b>Model F</b>           |                  |          |
|---------------------------------------|--------------------------|------------------|----------|--------------------------|------------------|----------|--------------------------|------------------|----------|
|                                       | <i>Estimates</i>         | <i>CI</i>        | <i>p</i> | <i>Estimates</i>         | <i>CI</i>        | <i>p</i> | <i>Estimates</i>         | <i>CI</i>        | <i>p</i> |
| Intercept                             | 55.03                    | 52.07 –<br>58.00 | <0.001   | 55.60                    | 52.96 –<br>58.24 | <0.001   | 55.21                    | 52.06 –<br>58.36 | <0.001   |
| Social Transition<br>Status           | -4.11                    | -6.71 –<br>-1.52 | 0.002    | -4.24                    | -6.83 –<br>-1.64 | 0.002    | -4.16                    | -6.78 –<br>-1.54 | 0.002    |
| Age (linear)                          | 0.04                     | -0.02 –<br>0.10  | 0.208    | 0.05                     | -0.02 –<br>0.11  | 0.159    | 0.04                     | -0.02 –<br>0.11  | 0.194    |
| Gender                                | -1.39                    | -7.29 –<br>4.51  | 0.638    |                          |                  |          | -1.38                    | -7.28 –<br>4.53  | 0.640    |
| Age (quadratic)                       |                          |                  |          | -0.00                    | -0.00 –<br>0.00  | 0.737    | -0.00                    | -0.00 –<br>0.00  | 0.742    |
| <b>Random Effects</b>                 |                          |                  |          |                          |                  |          |                          |                  |          |
| $\sigma^2$                            | 46.34                    |                  |          | 46.63                    |                  |          | 46.60                    |                  |          |
| $\tau_{00}$                           | 53.30 <sub>subject</sub> |                  |          | 52.00 <sub>subject</sub> |                  |          | 53.34 <sub>subject</sub> |                  |          |
| ICC                                   | 0.53                     |                  |          | 0.53                     |                  |          | 0.53                     |                  |          |
| N                                     | 45 <sub>subject</sub>    |                  |          | 45 <sub>subject</sub>    |                  |          | 45 <sub>subject</sub>    |                  |          |
| Obs.                                  | 193                      |                  |          | 193                      |                  |          | 193                      |                  |          |
| R <sup>2</sup> : Margin. /<br>Condit. | 0.048 / 0.557            |                  |          | 0.046 / 0.549            |                  |          | 0.048 / 0.556            |                  |          |

Table S6. Anxiety - Pre-COVID Visits - Single Transitioners - Not Age Adjusted – Models A - C

| <i>Predictors</i>                     | <b>Model A</b>   |                  |          | <b>Model B</b>   |                  |          | <b>Model C</b>   |                  |          |
|---------------------------------------|------------------|------------------|----------|------------------|------------------|----------|------------------|------------------|----------|
|                                       | <i>Estimates</i> | <i>CI</i>        | <i>p</i> | <i>Estimates</i> | <i>CI</i>        | <i>p</i> | <i>Estimates</i> | <i>CI</i>        | <i>p</i> |
| Intercept                             | 54.47            | 51.74 –<br>57.20 | <0.001   | 53.64            | 50.31 –<br>56.97 | <0.001   | 54.80            | 52.18 –<br>57.41 | <0.001   |
| Social Transition<br>Status           | -2.40            | -4.55 –<br>-0.25 | 0.029    | -2.39            | -4.54 –<br>-0.24 | 0.030    | -4.22            | -6.83 –<br>-1.60 | 0.002    |
| Gender                                |                  |                  |          | -2.93            | -9.57 –<br>3.72  | 0.378    |                  |                  |          |
| Age (linear)                          |                  |                  |          |                  |                  |          | 0.07             | 0.01 –<br>0.14   | 0.020    |
| <b>Random Effects</b>                 |                  |                  |          |                  |                  |          |                  |                  |          |
| $\sigma^2$                            | 42.44            |                  |          | 42.42            |                  |          | 42.38            |                  |          |
| $\tau_{00}$                           | 65.15            | subject          |          | 65.65            | subject          |          | 57.86            | subject          |          |
| ICC                                   | 0.61             |                  |          | 0.61             |                  |          | 0.58             |                  |          |
| N                                     | 42               | subject          |          | 42               | subject          |          | 42               | subject          |          |
| Obs.                                  | 179              |                  |          | 179              |                  |          | 179              |                  |          |
| R <sup>2</sup> : Margin. /<br>Condit. | 0.012 / 0.610    |                  |          | 0.026 / 0.618    |                  |          | 0.070 / 0.607    |                  |          |

Table S7. Anxiety - Pre-COVID Visits - Single Transitioners - Not Age Adjusted – Models D - F

| <i>Predictors</i>                     | <b>Model D</b>           |                  |          | <b>Model E</b>           |                  |          | <b>Model F</b>           |                  |          |
|---------------------------------------|--------------------------|------------------|----------|--------------------------|------------------|----------|--------------------------|------------------|----------|
|                                       | <i>Estimates</i>         | <i>CI</i>        | <i>p</i> | <i>Estimates</i>         | <i>CI</i>        | <i>p</i> | <i>Estimates</i>         | <i>CI</i>        | <i>p</i> |
| Intercept                             | 54.23                    | 51.00 –<br>57.46 | <0.001   | 55.75                    | 52.96 –<br>58.55 | <0.001   | 55.18                    | 51.82 –<br>58.54 | <0.001   |
| Social Transition Status              | -4.13                    | -6.77 –<br>-1.50 | 0.002    | -4.42                    | -7.03 –<br>-1.81 | 0.001    | -4.34                    | -6.96 –<br>-1.71 | 0.001    |
| Age (linear)                          | 0.07                     | 0.01 –<br>0.14   | 0.028    | 0.09                     | 0.02 –<br>0.15   | 0.008    | 0.08                     | 0.02 –<br>0.15   | 0.011    |
| Gender                                | -1.96                    | -8.37 –<br>4.45  | 0.539    |                          |                  |          | -1.99                    | -8.33 –<br>4.35  | 0.530    |
| Age (quadratic)                       |                          |                  |          | -0.00                    | -0.00 –<br>0.00  | 0.080    | -0.00                    | -0.00 –<br>0.00  | 0.080    |
| <b>Random Effects</b>                 |                          |                  |          |                          |                  |          |                          |                  |          |
| $\sigma^2$                            | 42.35                    |                  |          | 41.97                    |                  |          | 41.95                    |                  |          |
| $\tau_{00}$                           | 59.13 <sub>subject</sub> |                  |          | 56.66 <sub>subject</sub> |                  |          | 57.80 <sub>subject</sub> |                  |          |
| ICC                                   | 0.58                     |                  |          | 0.57                     |                  |          | 0.58                     |                  |          |
| N                                     | 42 <sub>subject</sub>    |                  |          | 42 <sub>subject</sub>    |                  |          | 42 <sub>subject</sub>    |                  |          |
| Obs.                                  | 179                      |                  |          | 179                      |                  |          | 179                      |                  |          |
| R <sup>2</sup> : Margin. /<br>Condit. | 0.076 / 0.615            |                  |          | 0.089 / 0.612            |                  |          | 0.094 / 0.619            |                  |          |

Table S8. Anxiety - Pre-COVID Visits - Single Transitioners - Age Adjusted – Models A - C

| <i>Predictors</i>                     | <b>Model A</b>           |                  |          | <b>Model B</b>           |                  |          | <b>Model C</b>           |                  |          |
|---------------------------------------|--------------------------|------------------|----------|--------------------------|------------------|----------|--------------------------|------------------|----------|
|                                       | <i>Estimates</i>         | <i>CI</i>        | <i>p</i> | <i>Estimates</i>         | <i>CI</i>        | <i>p</i> | <i>Estimates</i>         | <i>CI</i>        | <i>p</i> |
| Intercept                             | 55.35                    | 52.72 –<br>57.98 | <0.001   | 54.64                    | 51.43 –<br>57.85 | <0.001   | 55.55                    | 52.95 –<br>58.15 | <0.001   |
| Social Transition<br>Status           | -3.60                    | -5.78 –<br>-1.43 | 0.001    | -3.59                    | -5.76 –<br>-1.41 | 0.001    | -4.73                    | -7.37 –<br>-2.09 | 0.001    |
| Gender                                |                          |                  |          | -2.48                    | -8.88 –<br>3.92  | 0.437    |                          |                  |          |
| Age (linear)                          |                          |                  |          |                          |                  |          | 0.05                     | -0.02 –<br>0.11  | 0.144    |
| <b>Random Effects</b>                 |                          |                  |          |                          |                  |          |                          |                  |          |
| $\sigma^2$                            | 43.39                    |                  |          | 43.37                    |                  |          | 43.48                    |                  |          |
| $\tau_{00}$                           | 59.20 <sub>subject</sub> |                  |          | 59.96 <sub>subject</sub> |                  |          | 56.74 <sub>subject</sub> |                  |          |
| ICC                                   | 0.58                     |                  |          | 0.58                     |                  |          | 0.57                     |                  |          |
| N                                     | 42 <sub>subject</sub>    |                  |          | 42 <sub>subject</sub>    |                  |          | 42 <sub>subject</sub>    |                  |          |
| Obs.                                  | 179                      |                  |          | 179                      |                  |          | 179                      |                  |          |
| R <sup>2</sup> : Margin. /<br>Condit. | 0.028 / 0.589            |                  |          | 0.039 / 0.597            |                  |          | 0.054 / 0.590            |                  |          |



Table S9. Anxiety - Pre-COVID Visits - Single Transitioners - Age Adjusted – Models D - F

| <i>Predictors</i>                     | <b>Model D</b>           |                  |          | <b>Model E</b>           |                  |          | <b>Model F</b>           |                  |          |
|---------------------------------------|--------------------------|------------------|----------|--------------------------|------------------|----------|--------------------------|------------------|----------|
|                                       | <i>Estimates</i>         | <i>CI</i>        | <i>p</i> | <i>Estimates</i>         | <i>CI</i>        | <i>p</i> | <i>Estimates</i>         | <i>CI</i>        | <i>p</i> |
| Intercept                             | 55.01                    | 51.79 –<br>58.22 | <0.001   | 55.64                    | 52.83 –<br>58.45 | <0.001   | 55.09                    | 51.71 –<br>58.47 | <0.001   |
| Social Transition Status              | -4.65                    | -7.31 –<br>-2.00 | 0.001    | -4.75                    | -7.40 –<br>-2.09 | 0.001    | -4.67                    | -7.34 –<br>-2.00 | 0.001    |
| Age (linear)                          | 0.04                     | -0.02 –<br>0.11  | 0.175    | 0.05                     | -0.02 –<br>0.11  | 0.146    | 0.05                     | -0.02 –<br>0.11  | 0.176    |
| Gender                                | -1.90                    | -8.26 –<br>4.47  | 0.551    |                          |                  |          | -1.90                    | -8.28 –<br>4.48  | 0.551    |
| Age (quadratic)                       |                          |                  |          | -0.00                    | -0.00 –<br>0.00  | 0.879    | -0.00                    | -0.00 –<br>0.00  | 0.878    |
| <b>Random Effects</b>                 |                          |                  |          |                          |                  |          |                          |                  |          |
| $\sigma^2$                            | 43.46                    |                  |          | 43.76                    |                  |          | 43.74                    |                  |          |
| $\tau_{00}$                           | 57.97 <sub>subject</sub> |                  |          | 56.85 <sub>subject</sub> |                  |          | 58.08 <sub>subject</sub> |                  |          |
| ICC                                   | 0.57                     |                  |          | 0.57                     |                  |          | 0.57                     |                  |          |
| N                                     | 42 <sub>subject</sub>    |                  |          | 42 <sub>subject</sub>    |                  |          | 42 <sub>subject</sub>    |                  |          |
| Obs.                                  | 179                      |                  |          | 179                      |                  |          | 179                      |                  |          |
| R <sup>2</sup> : Margin. /<br>Condit. | 0.060 / 0.597            |                  |          | 0.055 / 0.589            |                  |          | 0.060 / 0.596            |                  |          |

Table S10. Anxiety - All Visits - All Transitioners - Not Age Adjusted – Models A - C

| <i>Predictors</i>                     | <b>Model A</b>           |                  |          | <b>Model B</b>           |                  |          | <b>Model C</b>           |                  |          |
|---------------------------------------|--------------------------|------------------|----------|--------------------------|------------------|----------|--------------------------|------------------|----------|
|                                       | <i>Estimates</i>         | <i>CI</i>        | <i>p</i> | <i>Estimates</i>         | <i>CI</i>        | <i>p</i> | <i>Estimates</i>         | <i>CI</i>        | <i>p</i> |
| Intercept                             | 54.47                    | 52.22 –<br>56.71 | <0.001   | 53.52                    | 50.90 –<br>56.14 | <0.001   | 54.62                    | 52.42 –<br>56.82 | <0.001   |
| Social Transition<br>Status           | -2.30                    | -4.43 –<br>-0.17 | 0.034    | -2.30                    | -4.43 –<br>-0.17 | 0.034    | -3.31                    | -5.93 –<br>-0.69 | 0.013    |
| Gender                                |                          |                  |          | -3.58                    | -8.79 –<br>1.62  | 0.173    |                          |                  |          |
| Age (linear)                          |                          |                  |          |                          |                  |          | 0.03                     | -0.02 –<br>0.08  | 0.201    |
| <b>Random Effects</b>                 |                          |                  |          |                          |                  |          |                          |                  |          |
| $\sigma^2$                            | 54.26                    |                  |          | 54.21                    |                  |          | 54.97                    |                  |          |
| $\tau_{00}$                           | 48.57 <sub>subject</sub> |                  |          | 47.69 <sub>subject</sub> |                  |          | 44.86 <sub>subject</sub> |                  |          |
| ICC                                   | 0.47                     |                  |          | 0.47                     |                  |          | 0.45                     |                  |          |
| N                                     | 50 <sub>subject</sub>    |                  |          | 50 <sub>subject</sub>    |                  |          | 50 <sub>subject</sub>    |                  |          |
| Obs.                                  | 234                      |                  |          | 234                      |                  |          | 234                      |                  |          |
| R <sup>2</sup> : Margin. /<br>Condit. | 0.011 / 0.478            |                  |          | 0.033 / 0.486            |                  |          | 0.025 / 0.463            |                  |          |

Table S11. Anxiety - All Visits - All Transitioners - Not Age Adjusted – Models D - F

| <i>Predictors</i>                     | <b>Model D</b>           |                  |          | <b>Model E</b>           |                  |          | <b>Model F</b>           |                  |          |
|---------------------------------------|--------------------------|------------------|----------|--------------------------|------------------|----------|--------------------------|------------------|----------|
|                                       | <i>Estimates</i>         | <i>CI</i>        | <i>p</i> | <i>Estimates</i>         | <i>CI</i>        | <i>p</i> | <i>Estimates</i>         | <i>CI</i>        | <i>p</i> |
| Intercept                             | 53.78                    | 51.16 –<br>56.40 | <0.001   | 55.88                    | 53.45 –<br>58.32 | <0.001   | 55.03                    | 52.21 –<br>57.85 | <0.001   |
| Social Transition<br>Status           | -3.13                    | -5.76 –<br>-0.49 | 0.020    | -3.50                    | -6.10 –<br>-0.90 | 0.008    | -3.33                    | -5.94 –<br>-0.71 | 0.013    |
| Age (linear)                          | 0.03                     | -0.02 –<br>0.08  | 0.300    | 0.04                     | -0.01 –<br>0.09  | 0.102    | 0.04                     | -0.02 –<br>0.09  | 0.163    |
| Gender                                | -3.09                    | -8.27 –<br>2.10  | 0.237    |                          |                  |          | -3.14                    | -8.36 –<br>2.09  | 0.233    |
| Age (quadratic)                       |                          |                  |          | -0.00                    | -0.00 –<br>-0.00 | 0.016    | -0.00                    | -0.00 –<br>-0.00 | 0.016    |
| <b>Random Effects</b>                 |                          |                  |          |                          |                  |          |                          |                  |          |
| $\sigma^2$                            | 54.79                    |                  |          | 53.30                    |                  |          | 53.15                    |                  |          |
| $\tau_{00}$                           | 45.10 <sub>subject</sub> |                  |          | 46.28 <sub>subject</sub> |                  |          | 46.39 <sub>subject</sub> |                  |          |
| ICC                                   | 0.45                     |                  |          | 0.46                     |                  |          | 0.47                     |                  |          |
| N                                     | 50 <sub>subject</sub>    |                  |          | 50 <sub>subject</sub>    |                  |          | 50 <sub>subject</sub>    |                  |          |
| Obs.                                  | 234                      |                  |          | 234                      |                  |          | 234                      |                  |          |
| R <sup>2</sup> : Margin. /<br>Condit. | 0.042 / 0.474            |                  |          | 0.044 / 0.488            |                  |          | 0.060 / 0.498            |                  |          |

Table S12. Anxiety - All Visits - All Transitioners - Age Adjusted – Models A - C

| <i>Predictors</i>                     | <b>Model A</b>           |                  |          | <b>Model B</b>           |                  |          | <b>Model C</b>           |                  |          |
|---------------------------------------|--------------------------|------------------|----------|--------------------------|------------------|----------|--------------------------|------------------|----------|
|                                       | <i>Estimates</i>         | <i>CI</i>        | <i>p</i> | <i>Estimates</i>         | <i>CI</i>        | <i>p</i> | <i>Estimates</i>         | <i>CI</i>        | <i>p</i> |
| Intercept                             | 55.35                    | 53.16 –<br>57.53 | <0.001   | 54.54                    | 51.99 –<br>57.10 | <0.001   | 55.39                    | 53.19 –<br>57.59 | <0.001   |
| Social Transition<br>Status           | -3.73                    | -5.84 –<br>-1.61 | 0.001    | -3.73                    | -5.84 –<br>-1.61 | 0.001    | -4.00                    | -6.60 –<br>-1.41 | 0.003    |
| Gender                                |                          |                  |          | -3.04                    | -8.12 –<br>2.03  | 0.234    |                          |                  |          |
| Age (linear)                          |                          |                  |          |                          |                  |          | 0.01                     | -0.04 –<br>0.06  | 0.724    |
| <b>Random Effects</b>                 |                          |                  |          |                          |                  |          |                          |                  |          |
| $\sigma^2$                            | 53.47                    |                  |          | 53.43                    |                  |          | 53.80                    |                  |          |
| $\tau_{00}$                           | 45.28 <sub>subject</sub> |                  |          | 44.94 <sub>subject</sub> |                  |          | 44.93 <sub>subject</sub> |                  |          |
| ICC                                   | 0.46                     |                  |          | 0.46                     |                  |          | 0.46                     |                  |          |
| N                                     | 50 <sub>subject</sub>    |                  |          | 50 <sub>subject</sub>    |                  |          | 50 <sub>subject</sub>    |                  |          |
| Obs.                                  | 234                      |                  |          | 234                      |                  |          | 234                      |                  |          |
| R <sup>2</sup> : Margin. /<br>Condit. | 0.030 / 0.475            |                  |          | 0.047 / 0.482            |                  |          | 0.032 / 0.473            |                  |          |

Table S13. Anxiety - All Visits - All Transitioners - Age Adjusted – Models A - C

| <i>Predictors</i>                     | <b>Model D</b>           |                  |          | <b>Model E</b>           |                  |          | <b>Model F</b>           |                  |          |
|---------------------------------------|--------------------------|------------------|----------|--------------------------|------------------|----------|--------------------------|------------------|----------|
|                                       | <i>Estimates</i>         | <i>CI</i>        | <i>p</i> | <i>Estimates</i>         | <i>CI</i>        | <i>p</i> | <i>Estimates</i>         | <i>CI</i>        | <i>p</i> |
| Intercept                             | 54.58                    | 51.97 –<br>57.19 | <0.001   | 55.69                    | 53.27 –<br>58.12 | <0.001   | 54.88                    | 52.07 –<br>57.69 | <0.001   |
| Social Transition<br>Status           | -3.83                    | -6.44 –<br>-1.22 | 0.004    | -4.06                    | -6.66 –<br>-1.45 | 0.002    | -3.88                    | -6.50 –<br>-1.26 | 0.004    |
| Age (linear)                          | 0.00                     | -0.05 –<br>0.05  | 0.894    | 0.01                     | -0.04 –<br>0.06  | 0.658    | 0.01                     | -0.05 –<br>0.06  | 0.822    |
| Gender                                | -2.98                    | -8.15 –<br>2.20  | 0.253    |                          |                  |          | -2.99                    | -8.18 –<br>2.21  | 0.253    |
| Age (quadratic)                       |                          |                  |          | -0.00                    | -0.00 –<br>0.00  | 0.568    | -0.00                    | -0.00 –<br>0.00  | 0.564    |
| <b>Random Effects</b>                 |                          |                  |          |                          |                  |          |                          |                  |          |
| $\sigma^2$                            | 53.65                    |                  |          | 53.89                    |                  |          | 53.75                    |                  |          |
| $\tau_{00}$                           | 45.17 <sub>subject</sub> |                  |          | 45.32 <sub>subject</sub> |                  |          | 45.54 <sub>subject</sub> |                  |          |
| ICC                                   | 0.46                     |                  |          | 0.46                     |                  |          | 0.46                     |                  |          |
| N                                     | 50 <sub>subject</sub>    |                  |          | 50 <sub>subject</sub>    |                  |          | 50 <sub>subject</sub>    |                  |          |
| Obs.                                  | 234                      |                  |          | 234                      |                  |          | 234                      |                  |          |
| R <sup>2</sup> : Margin. /<br>Condit. | 0.047 / 0.482            |                  |          | 0.033 / 0.475            |                  |          | 0.048 / 0.484            |                  |          |

Table S14. Anxiety - All Visits - Single Transitioners - Not Age Adjusted – Models A - C

| <i>Predictors</i>                     | <b>Model A</b>           |                  |          | <b>Model B</b>           |                  |          | <b>Model C</b>           |                  |          |
|---------------------------------------|--------------------------|------------------|----------|--------------------------|------------------|----------|--------------------------|------------------|----------|
|                                       | <i>Estimates</i>         | <i>CI</i>        | <i>p</i> | <i>Estimates</i>         | <i>CI</i>        | <i>p</i> | <i>Estimates</i>         | <i>CI</i>        | <i>p</i> |
| Intercept                             | 54.60                    | 52.22 –<br>56.98 | <0.001   | 53.56                    | 50.76 –<br>56.36 | <0.001   | 54.78                    | 52.44 –<br>57.12 | <0.001   |
| Social Transition<br>Status           | -2.90                    | -5.08 –<br>-0.72 | 0.009    | -2.90                    | -5.08 –<br>-0.72 | 0.009    | -3.93                    | -6.63 –<br>-1.24 | 0.004    |
| Gender                                |                          |                  |          | -3.83                    | -9.39 –<br>1.73  | 0.172    |                          |                  |          |
| Age (linear)                          |                          |                  |          |                          |                  |          | 0.03                     | -0.02 –<br>0.09  | 0.204    |
| <b>Random Effects</b>                 |                          |                  |          |                          |                  |          |                          |                  |          |
| $\sigma^2$                            | 52.06                    |                  |          | 52.02                    |                  |          | 52.67                    |                  |          |
| $\tau_{00}$                           | 52.04 <sub>subject</sub> |                  |          | 50.98 <sub>subject</sub> |                  |          | 48.48 <sub>subject</sub> |                  |          |
| ICC                                   | 0.50                     |                  |          | 0.49                     |                  |          | 0.48                     |                  |          |
| N                                     | 47 <sub>subject</sub>    |                  |          | 47 <sub>subject</sub>    |                  |          | 47 <sub>subject</sub>    |                  |          |
| Obs.                                  | 217                      |                  |          | 217                      |                  |          | 217                      |                  |          |
| R <sup>2</sup> : Margin. /<br>Condit. | 0.018 / 0.509            |                  |          | 0.042 / 0.516            |                  |          | 0.032 / 0.496            |                  |          |

Table S15. Anxiety - All Visits - Single Transitioners - Not Age Adjusted – Models D - F

| <i>Predictors</i>                     | <b>Model D</b>           |                  |          | <b>Model E</b>           |                  |          | <b>Model F</b>           |                  |          |
|---------------------------------------|--------------------------|------------------|----------|--------------------------|------------------|----------|--------------------------|------------------|----------|
|                                       | <i>Estimates</i>         | <i>CI</i>        | <i>p</i> | <i>Estimates</i>         | <i>CI</i>        | <i>p</i> | <i>Estimates</i>         | <i>CI</i>        | <i>p</i> |
| Intercept                             | 53.84                    | 51.05 –<br>56.64 | <0.001   | 56.02                    | 53.44 –<br>58.59 | <0.001   | 55.06                    | 52.07 –<br>58.06 | <0.001   |
| Social Transition<br>Status           | -3.77                    | -6.47 –<br>-1.07 | 0.006    | -4.08                    | -6.75 –<br>-1.40 | 0.003    | -3.91                    | -6.59 –<br>-1.23 | 0.004    |
| Age (linear)                          | 0.03                     | -0.02 –<br>0.08  | 0.290    | 0.04                     | -0.01 –<br>0.09  | 0.114    | 0.04                     | -0.02 –<br>0.09  | 0.170    |
| Gender                                | -3.35                    | -8.88 –<br>2.18  | 0.228    |                          |                  |          | -3.44                    | -9.01 –<br>2.12  | 0.219    |
| Age (quadratic)                       |                          |                  |          | -0.00                    | -0.00 –<br>-0.00 | 0.022    | -0.00                    | -0.00 –<br>-0.00 | 0.021    |
| <b>Random Effects</b>                 |                          |                  |          |                          |                  |          |                          |                  |          |
| $\sigma^2$                            | 52.53                    |                  |          | 51.11                    |                  |          | 50.99                    |                  |          |
| $\tau_{00}$                           | 48.46 <sub>subject</sub> |                  |          | 49.93 <sub>subject</sub> |                  |          | 49.73 <sub>subject</sub> |                  |          |
| ICC                                   | 0.48                     |                  |          | 0.49                     |                  |          | 0.49                     |                  |          |
| N                                     | 47 <sub>subject</sub>    |                  |          | 47 <sub>subject</sub>    |                  |          | 47 <sub>subject</sub>    |                  |          |
| Obs.                                  | 217                      |                  |          | 217                      |                  |          | 217                      |                  |          |
| R <sup>2</sup> : Margin. /<br>Condit. | 0.051 / 0.506            |                  |          | 0.051 / 0.520            |                  |          | 0.068 / 0.528            |                  |          |

Table S16. Anxiety - All Visits - Single Transitioners - Age Adjusted – Models A - C

| <i>Predictors</i>                     | <b>Model A</b>           |                  |          | <b>Model B</b>           |                  |          | <b>Model C</b>           |                  |          |
|---------------------------------------|--------------------------|------------------|----------|--------------------------|------------------|----------|--------------------------|------------------|----------|
|                                       | <i>Estimates</i>         | <i>CI</i>        | <i>p</i> | <i>Estimates</i>         | <i>CI</i>        | <i>p</i> | <i>Estimates</i>         | <i>CI</i>        | <i>p</i> |
| Intercept                             | 55.43                    | 53.11 –<br>57.75 | <0.001   | 54.52                    | 51.78 –<br>57.25 | <0.001   | 55.49                    | 53.15 –<br>57.82 | <0.001   |
| Social Transition<br>Status           | -4.15                    | -6.33 –<br>-1.97 | <0.001   | -4.15                    | -6.33 –<br>-1.97 | <0.001   | -4.47                    | -7.16 –<br>-1.79 | 0.001    |
| Gender                                |                          |                  |          | -3.39                    | -8.82 –<br>2.05  | 0.216    |                          |                  |          |
| Age (linear)                          |                          |                  |          |                          |                  |          | 0.01                     | -0.04 –<br>0.06  | 0.690    |
| <b>Random Effects</b>                 |                          |                  |          |                          |                  |          |                          |                  |          |
| $\sigma^2$                            | 52.02                    |                  |          | 51.98                    |                  |          | 52.35                    |                  |          |
| $\tau_{00}$                           | 48.80 <sub>subject</sub> |                  |          | 48.21 <sub>subject</sub> |                  |          | 48.41 <sub>subject</sub> |                  |          |
| ICC                                   | 0.48                     |                  |          | 0.48                     |                  |          | 0.48                     |                  |          |
| N                                     | 47 <sub>subject</sub>    |                  |          | 47 <sub>subject</sub>    |                  |          | 47 <sub>subject</sub>    |                  |          |
| Obs.                                  | 217                      |                  |          | 217                      |                  |          | 217                      |                  |          |
| R <sup>2</sup> : Margin. /<br>Condit. | 0.036 / 0.503            |                  |          | 0.056 / 0.510            |                  |          | 0.039 / 0.501            |                  |          |



Table S17. Anxiety - All Visits - Single Transitioners - Age Adjusted – Models D - F

| <i>Predictors</i>                     | <b>Model D</b>           |                  |          | <b>Model E</b>           |                  |          | <b>Model F</b>           |                  |          |
|---------------------------------------|--------------------------|------------------|----------|--------------------------|------------------|----------|--------------------------|------------------|----------|
|                                       | <i>Estimates</i>         | <i>CI</i>        | <i>p</i> | <i>Estimates</i>         | <i>CI</i>        | <i>p</i> | <i>Estimates</i>         | <i>CI</i>        | <i>p</i> |
| Intercept                             | 54.57                    | 51.78 –<br>57.36 | <0.001   | 55.79                    | 53.22 –<br>58.35 | <0.001   | 54.87                    | 51.88 –<br>57.86 | <0.001   |
| Social Transition Status              | -4.31                    | -7.01 –<br>-1.62 | 0.002    | -4.51                    | -7.21 –<br>-1.82 | 0.001    | -4.35                    | -7.06 –<br>-1.65 | 0.002    |
| Age (linear)                          | 0.01                     | -0.05 –<br>0.06  | 0.842    | 0.01                     | -0.04 –<br>0.07  | 0.634    | 0.01                     | -0.05 –<br>0.06  | 0.780    |
| Gender                                | -3.30                    | -8.82 –<br>2.22  | 0.235    |                          |                  |          | -3.32                    | -8.86 –<br>2.22  | 0.234    |
| Age (quadratic)                       |                          |                  |          | -0.00                    | -0.00 –<br>0.00  | 0.582    | -0.00                    | -0.00 –<br>0.00  | 0.572    |
| <b>Random Effects</b>                 |                          |                  |          |                          |                  |          |                          |                  |          |
| $\sigma^2$                            | 52.23                    |                  |          | 52.47                    |                  |          | 52.35                    |                  |          |
| $\tau_{00}$                           | 48.36 <sub>subject</sub> |                  |          | 48.84 <sub>subject</sub> |                  |          | 48.76 <sub>subject</sub> |                  |          |
| ICC                                   | 0.48                     |                  |          | 0.48                     |                  |          | 0.48                     |                  |          |
| N                                     | 47 <sub>subject</sub>    |                  |          | 47 <sub>subject</sub>    |                  |          | 47 <sub>subject</sub>    |                  |          |
| Obs.                                  | 217                      |                  |          | 217                      |                  |          | 217                      |                  |          |
| R <sup>2</sup> : Margin. /<br>Condit. | 0.056 / 0.510            |                  |          | 0.040 / 0.503            |                  |          | 0.057 / 0.512            |                  |          |

Table S18. Depressive Symptoms - Pre-COVID Visits - All Transitioners - Not Age Adjusted – Models A - C

| <i>Predictors</i>                     | <b>Model A</b>           |                  |          | <b>Model B</b>           |                  |          | <b>Model C</b>           |                  |          |
|---------------------------------------|--------------------------|------------------|----------|--------------------------|------------------|----------|--------------------------|------------------|----------|
|                                       | <i>Estimates</i>         | <i>CI</i>        | <i>p</i> | <i>Estimates</i>         | <i>CI</i>        | <i>p</i> | <i>Estimates</i>         | <i>CI</i>        | <i>p</i> |
| Intercept                             | 53.19                    | 51.10 –<br>55.29 | <0.001   | 52.70                    | 50.15 –<br>55.24 | <0.001   | 53.43                    | 51.39 –<br>55.48 | <0.001   |
| Social Transition Status              | -1.04                    | -2.88 –<br>0.80  | 0.264    | -1.03                    | -2.87 –<br>0.81  | 0.270    | -2.61                    | -4.80 –<br>-0.43 | 0.019    |
| Gender                                |                          |                  |          | -1.76                    | -6.84 –<br>3.31  | 0.487    |                          |                  |          |
| Age (linear)                          |                          |                  |          |                          |                  |          | 0.07                     | 0.01 –<br>0.12   | 0.012    |
| <b>Random Effects</b>                 |                          |                  |          |                          |                  |          |                          |                  |          |
| $\sigma^2$                            | 34.82                    |                  |          | 34.80                    |                  |          | 34.19                    |                  |          |
| $\tau_{00}$                           | 40.41 <sub>subject</sub> |                  |          | 41.05 <sub>subject</sub> |                  |          | 37.78 <sub>subject</sub> |                  |          |
| ICC                                   | 0.54                     |                  |          | 0.54                     |                  |          | 0.52                     |                  |          |
| N                                     | 46 <sub>subject</sub>    |                  |          | 46 <sub>subject</sub>    |                  |          | 46 <sub>subject</sub>    |                  |          |
| Obs.                                  | 199                      |                  |          | 199                      |                  |          | 199                      |                  |          |
| R <sup>2</sup> : Margin. /<br>Condit. | 0.003 / 0.539            |                  |          | 0.011 / 0.546            |                  |          | 0.064 / 0.555            |                  |          |

Table S19. Depressive Symptoms - Pre-COVID Visits - All Transitioners - Not Age Adjusted – Models D - F

| <i>Predictors</i>                     | <b>Model D</b>           |                  |          | <b>Model E</b>           |                  |          | <b>Model F</b>           |                  |          |
|---------------------------------------|--------------------------|------------------|----------|--------------------------|------------------|----------|--------------------------|------------------|----------|
|                                       | <i>Estimates</i>         | <i>CI</i>        | <i>p</i> | <i>Estimates</i>         | <i>CI</i>        | <i>p</i> | <i>Estimates</i>         | <i>CI</i>        | <i>p</i> |
| Intercept                             | 53.20                    | 50.69 –<br>55.72 | <0.001   | 54.07                    | 51.86 –<br>56.28 | <0.001   | 53.85                    | 51.20 –<br>56.49 | <0.001   |
| Social Transition Status              | -2.58                    | -4.78 –<br>-0.38 | 0.022    | -2.78                    | -4.97 –<br>-0.59 | 0.013    | -2.75                    | -4.95 –<br>-0.54 | 0.015    |
| Age (linear)                          | 0.07                     | 0.01 –<br>0.12   | 0.016    | 0.08                     | 0.02 –<br>0.13   | 0.005    | 0.07                     | 0.02 –<br>0.13   | 0.007    |
| Gender                                | -0.81                    | -5.82 –<br>4.19  | 0.744    |                          |                  |          | -0.79                    | -5.75 –<br>4.18  | 0.750    |
| Age (quadratic)                       |                          |                  |          | -0.00                    | -0.00 –<br>0.00  | 0.157    | -0.00                    | -0.00 –<br>0.00  | 0.159    |
| <b>Random Effects</b>                 |                          |                  |          |                          |                  |          |                          |                  |          |
| $\sigma^2$                            | 34.19                    |                  |          | 34.12                    |                  |          | 34.12                    |                  |          |
| $\tau_{00}$                           | 38.74 <sub>subject</sub> |                  |          | 37.05 <sub>subject</sub> |                  |          | 37.98 <sub>subject</sub> |                  |          |
| ICC                                   | 0.53                     |                  |          | 0.52                     |                  |          | 0.53                     |                  |          |
| N                                     | 46 <sub>subject</sub>    |                  |          | 46 <sub>subject</sub>    |                  |          | 46 <sub>subject</sub>    |                  |          |
| Obs.                                  | 199                      |                  |          | 199                      |                  |          | 199                      |                  |          |
| R <sup>2</sup> : Margin. /<br>Condit. | 0.065 / 0.562            |                  |          | 0.074 / 0.556            |                  |          | 0.075 / 0.562            |                  |          |

Table S20. Depressive Symptoms - Pre-COVID Visits - All Transitioners - Age Adjusted – Models A - C

| <i>Predictors</i>                     | <b>Model A</b>           |                  |          | <b>Model B</b>           |                  |          | <b>Model C</b>           |                  |          |
|---------------------------------------|--------------------------|------------------|----------|--------------------------|------------------|----------|--------------------------|------------------|----------|
|                                       | <i>Estimates</i>         | <i>CI</i>        | <i>p</i> | <i>Estimates</i>         | <i>CI</i>        | <i>p</i> | <i>Estimates</i>         | <i>CI</i>        | <i>p</i> |
| Intercept                             | 54.66                    | 52.67 –<br>56.66 | <0.001   | 54.39                    | 51.96 –<br>56.82 | <0.001   | 54.75                    | 52.72 –<br>56.77 | <0.001   |
| Social Transition<br>Status           | -3.36                    | -5.25 –<br>-1.47 | 0.001    | -3.35                    | -5.24 –<br>-1.46 | 0.001    | -3.86                    | -6.10 –<br>-1.62 | 0.001    |
| Gender                                |                          |                  |          | -1.00                    | -5.84 –<br>3.84  | 0.680    |                          |                  |          |
| Age (linear)                          |                          |                  |          |                          |                  |          | 0.02                     | -0.03 –<br>0.07  | 0.410    |
| <b>Random Effects</b>                 |                          |                  |          |                          |                  |          |                          |                  |          |
| $\sigma^2$                            | 36.93                    |                  |          | 36.92                    |                  |          | 36.82                    |                  |          |
| $\tau_{00}$                           | 35.25 <sub>subject</sub> |                  |          | 36.11 <sub>subject</sub> |                  |          | 36.04 <sub>subject</sub> |                  |          |
| ICC                                   | 0.49                     |                  |          | 0.49                     |                  |          | 0.49                     |                  |          |
| N                                     | 46 <sub>subject</sub>    |                  |          | 46 <sub>subject</sub>    |                  |          | 46 <sub>subject</sub>    |                  |          |
| Obs.                                  | 199                      |                  |          | 199                      |                  |          | 199                      |                  |          |
| R <sup>2</sup> : Margin. /<br>Condit. | 0.035 / 0.506            |                  |          | 0.037 / 0.513            |                  |          | 0.043 / 0.516            |                  |          |

Table S21. Depressive Symptoms - Pre-COVID Visits - All Transitioners - Age Adjusted – Models D - F

| <i>Predictors</i>                     | <b>Model D</b>           |                  |          | <b>Model E</b>           |                  |          | <b>Model F</b>           |                  |          |
|---------------------------------------|--------------------------|------------------|----------|--------------------------|------------------|----------|--------------------------|------------------|----------|
|                                       | <i>Estimates</i>         | <i>CI</i>        | <i>p</i> | <i>Estimates</i>         | <i>CI</i>        | <i>p</i> | <i>Estimates</i>         | <i>CI</i>        | <i>p</i> |
| Intercept                             | 54.55                    | 52.06 –<br>57.04 | <0.001   | 54.01                    | 51.80 –<br>56.23 | <0.001   | 53.81                    | 51.15 –<br>56.46 | <0.001   |
| Social Transition Status              | -3.83                    | -6.09 –<br>-1.58 | 0.001    | -3.68                    | -5.92 –<br>-1.44 | 0.001    | -3.64                    | -5.90 –<br>-1.38 | 0.002    |
| Age (linear)                          | 0.02                     | -0.03 –<br>0.07  | 0.441    | 0.01                     | -0.04 –<br>0.07  | 0.680    | 0.01                     | -0.04 –<br>0.06  | 0.716    |
| Gender                                | -0.70                    | -5.65 –<br>4.25  | 0.777    |                          |                  |          | -0.72                    | -5.69 –<br>4.25  | 0.770    |
| Age (quadratic)                       |                          |                  |          | 0.00                     | -0.00 –<br>0.00  | 0.112    | 0.00                     | -0.00 –<br>0.00  | 0.112    |
| <b>Random Effects</b>                 |                          |                  |          |                          |                  |          |                          |                  |          |
| $\sigma^2$                            | 36.83                    |                  |          | 36.36                    |                  |          | 36.36                    |                  |          |
| $\tau_{00}$                           | 36.98 <sub>subject</sub> |                  |          | 36.55 <sub>subject</sub> |                  |          | 37.51 <sub>subject</sub> |                  |          |
| ICC                                   | 0.50                     |                  |          | 0.50                     |                  |          | 0.51                     |                  |          |
| N                                     | 46 <sub>subject</sub>    |                  |          | 46 <sub>subject</sub>    |                  |          | 46 <sub>subject</sub>    |                  |          |
| Obs.                                  | 199                      |                  |          | 199                      |                  |          | 199                      |                  |          |
| R <sup>2</sup> : Margin. /<br>Condit. | 0.044 / 0.523            |                  |          | 0.051 / 0.527            |                  |          | 0.052 / 0.533            |                  |          |

Table S22. Depressive Symptoms - Pre-COVID Visits - Single Transitioners - Not Age Adjusted – Models A - C

| <i>Predictors</i>                     | <b>Model A</b>           |                  |          | <b>Model B</b>           |                  |          | <b>Model C</b>           |                  |          |
|---------------------------------------|--------------------------|------------------|----------|--------------------------|------------------|----------|--------------------------|------------------|----------|
|                                       | <i>Estimates</i>         | <i>CI</i>        | <i>p</i> | <i>Estimates</i>         | <i>CI</i>        | <i>p</i> | <i>Estimates</i>         | <i>CI</i>        | <i>p</i> |
| Intercept                             | 53.19                    | 50.98 –<br>55.41 | <0.001   | 52.67                    | 49.94 –<br>55.40 | <0.001   | 53.50                    | 51.32 –<br>55.68 | <0.001   |
| Social Transition Status              | -1.56                    | -3.41 –<br>0.30  | 0.100    | -1.55                    | -3.40 –<br>0.31  | 0.102    | -3.22                    | -5.44 –<br>-1.00 | 0.005    |
| Gender                                |                          |                  |          | -1.81                    | -7.26 –<br>3.63  | 0.505    |                          |                  |          |
| Age (linear)                          |                          |                  |          |                          |                  |          | 0.07                     | 0.02 –<br>0.12   | 0.010    |
| <b>Random Effects</b>                 |                          |                  |          |                          |                  |          |                          |                  |          |
| $\sigma^2$                            | 32.49                    |                  |          | 32.49                    |                  |          | 31.64                    |                  |          |
| $\tau_{00}$                           | 42.97 <sub>subject</sub> |                  |          | 43.70 <sub>subject</sub> |                  |          | 40.87 <sub>subject</sub> |                  |          |
| ICC                                   | 0.57                     |                  |          | 0.57                     |                  |          | 0.56                     |                  |          |
| N                                     | 43 <sub>subject</sub>    |                  |          | 43 <sub>subject</sub>    |                  |          | 43 <sub>subject</sub>    |                  |          |
| Obs.                                  | 185                      |                  |          | 185                      |                  |          | 185                      |                  |          |
| R <sup>2</sup> : Margin. /<br>Condit. | 0.007 / 0.573            |                  |          | 0.015 / 0.580            |                  |          | 0.074 / 0.596            |                  |          |

Table S23. Depressive Symptoms - Pre-COVID Visits - Single Transitioners - Not Age Adjusted – Models D - F

| <i>Predictors</i>                     | <b>Model D</b>           |                  |          | <b>Model E</b>           |                  |          | <b>Model F</b>           |                  |          |
|---------------------------------------|--------------------------|------------------|----------|--------------------------|------------------|----------|--------------------------|------------------|----------|
|                                       | <i>Estimates</i>         | <i>CI</i>        | <i>p</i> | <i>Estimates</i>         | <i>CI</i>        | <i>p</i> | <i>Estimates</i>         | <i>CI</i>        | <i>p</i> |
| Intercept                             | 53.22                    | 50.50 –<br>55.93 | <0.001   | 53.96                    | 51.62 –<br>56.30 | <0.001   | 53.68                    | 50.84 –<br>56.52 | <0.001   |
| Social Transition Status              | -3.19                    | -5.42 –<br>-0.96 | 0.005    | -3.32                    | -5.55 –<br>-1.09 | 0.004    | -3.29                    | -5.53 –<br>-1.05 | 0.004    |
| Age (linear)                          | 0.07                     | 0.01 –<br>0.12   | 0.013    | 0.08                     | 0.02 –<br>0.13   | 0.006    | 0.07                     | 0.02 –<br>0.13   | 0.008    |
| Gender                                | -0.96                    | -6.34 –<br>4.43  | 0.721    |                          |                  |          | -0.98                    | -6.34 –<br>4.38  | 0.714    |
| Age (quadratic)                       |                          |                  |          | -0.00                    | -0.00 –<br>0.00  | 0.309    | -0.00                    | -0.00 –<br>0.00  | 0.310    |
| <b>Random Effects</b>                 |                          |                  |          |                          |                  |          |                          |                  |          |
| $\sigma^2$                            | 31.64                    |                  |          | 31.72                    |                  |          | 31.73                    |                  |          |
| $\tau_{00}$                           | 41.90 <sub>subject</sub> |                  |          | 40.36 <sub>subject</sub> |                  |          | 41.37 <sub>subject</sub> |                  |          |
| ICC                                   | 0.57                     |                  |          | 0.56                     |                  |          | 0.57                     |                  |          |
| N                                     | 43 <sub>subject</sub>    |                  |          | 43 <sub>subject</sub>    |                  |          | 43 <sub>subject</sub>    |                  |          |
| Obs.                                  | 185                      |                  |          | 185                      |                  |          | 185                      |                  |          |
| R <sup>2</sup> : Margin. /<br>Condit. | 0.076 / 0.602            |                  |          | 0.081 / 0.596            |                  |          | 0.082 / 0.602            |                  |          |

Table S24. Depressive Symptoms - Pre-COVID Visits - Single Transitioners - Age Adjusted – Models A - C

| <i>Predictors</i>                     | <b>Model A</b>           |                  |          | <b>Model B</b>           |                  |          | <b>Model C</b>           |                  |          |
|---------------------------------------|--------------------------|------------------|----------|--------------------------|------------------|----------|--------------------------|------------------|----------|
|                                       | <i>Estimates</i>         | <i>CI</i>        | <i>p</i> | <i>Estimates</i>         | <i>CI</i>        | <i>p</i> | <i>Estimates</i>         | <i>CI</i>        | <i>p</i> |
| Intercept                             | 54.45                    | 52.33 –<br>56.56 | <0.001   | 54.02                    | 51.41 –<br>56.64 | <0.001   | 54.57                    | 52.42 –<br>56.73 | <0.001   |
| Social Transition<br>Status           | -3.20                    | -5.15 –<br>-1.26 | 0.001    | -3.19                    | -5.14 –<br>-1.25 | 0.001    | -3.87                    | -6.19 –<br>-1.56 | 0.001    |
| Gender                                |                          |                  |          | -1.47                    | -6.67 –<br>3.74  | 0.573    |                          |                  |          |
| Age (linear)                          |                          |                  |          |                          |                  |          | 0.03                     | -0.03 –<br>0.08  | 0.298    |
| <b>Random Effects</b>                 |                          |                  |          |                          |                  |          |                          |                  |          |
| $\sigma^2$                            | 35.85                    |                  |          | 35.85                    |                  |          | 35.62                    |                  |          |
| $\tau_{00}$                           | 37.68 <sub>subject</sub> |                  |          | 38.47 <sub>subject</sub> |                  |          | 38.68 <sub>subject</sub> |                  |          |
| ICC                                   | 0.51                     |                  |          | 0.52                     |                  |          | 0.52                     |                  |          |
| N                                     | 43 <sub>subject</sub>    |                  |          | 43 <sub>subject</sub>    |                  |          | 43 <sub>subject</sub>    |                  |          |
| Obs.                                  | 185                      |                  |          | 185                      |                  |          | 185                      |                  |          |
| R <sup>2</sup> : Margin. /<br>Condit. | 0.031 / 0.528            |                  |          | 0.036 / 0.535            |                  |          | 0.044 / 0.542            |                  |          |



Table S25. Depressive Symptoms - Pre-COVID Visits - Single Transitioners - Age Adjusted – Models D - F

| <i>Predictors</i>                     | <b>Model D</b>           |                  |          | <b>Model E</b>           |                  |          | <b>Model F</b>           |                  |          |
|---------------------------------------|--------------------------|------------------|----------|--------------------------|------------------|----------|--------------------------|------------------|----------|
|                                       | <i>Estimates</i>         | <i>CI</i>        | <i>p</i> | <i>Estimates</i>         | <i>CI</i>        | <i>p</i> | <i>Estimates</i>         | <i>CI</i>        | <i>p</i> |
| Intercept                             | 54.24                    | 51.56 –<br>56.92 | <0.001   | 53.89                    | 51.54 –<br>56.23 | <0.001   | 53.57                    | 50.73 –<br>56.41 | <0.001   |
| Social Transition Status              | -3.83                    | -6.16 –<br>-1.50 | 0.001    | -3.74                    | -6.05 –<br>-1.42 | 0.002    | -3.70                    | -6.03 –<br>-1.37 | 0.002    |
| Age (linear)                          | 0.03                     | -0.03 –<br>0.08  | 0.328    | 0.02                     | -0.04 –<br>0.07  | 0.491    | 0.02                     | -0.04 –<br>0.07  | 0.526    |
| Gender                                | -1.13                    | -6.44 –<br>4.19  | 0.670    |                          |                  |          | -1.09                    | -6.43 –<br>4.24  | 0.681    |
| Age (quadratic)                       |                          |                  |          | 0.00                     | -0.00 –<br>0.00  | 0.151    | 0.00                     | -0.00 –<br>0.00  | 0.152    |
| <b>Random Effects</b>                 |                          |                  |          |                          |                  |          |                          |                  |          |
| $\sigma^2$                            | 35.63                    |                  |          | 35.28                    |                  |          | 35.29                    |                  |          |
| $\tau_{00}$                           | 39.59 <sub>subject</sub> |                  |          | 39.05 <sub>subject</sub> |                  |          | 40.00 <sub>subject</sub> |                  |          |
| ICC                                   | 0.53                     |                  |          | 0.53                     |                  |          | 0.53                     |                  |          |
| N                                     | 43 <sub>subject</sub>    |                  |          | 43 <sub>subject</sub>    |                  |          | 43 <sub>subject</sub>    |                  |          |
| Obs.                                  | 185                      |                  |          | 185                      |                  |          | 185                      |                  |          |
| R <sup>2</sup> : Margin. /<br>Condit. | 0.047 / 0.548            |                  |          | 0.050 / 0.549            |                  |          | 0.053 / 0.556            |                  |          |

Table S26. Depressive Symptoms - All Visits - All Transitioners - Not Age Adjusted – Models A - C

| <i>Predictors</i>                     | <b>Model A</b>           |                  |          | <b>Model B</b>           |                  |          | <b>Model C</b>           |                  |          |
|---------------------------------------|--------------------------|------------------|----------|--------------------------|------------------|----------|--------------------------|------------------|----------|
|                                       | <i>Estimates</i>         | <i>CI</i>        | <i>p</i> | <i>Estimates</i>         | <i>CI</i>        | <i>p</i> | <i>Estimates</i>         | <i>CI</i>        | <i>p</i> |
| Intercept                             | 53.20                    | 51.33 –<br>55.07 | <0.001   | 52.50                    | 50.29 –<br>54.70 | <0.001   | 53.47                    | 51.65 –<br>55.29 | <0.001   |
| Social Transition<br>Status           | -0.31                    | -2.14 –<br>1.52  | 0.741    | -0.31                    | -2.14 –<br>1.52  | 0.742    | -1.97                    | -4.18 –<br>0.23  | 0.079    |
| Gender                                |                          |                  |          | -2.62                    | -6.99 –<br>1.75  | 0.235    |                          |                  |          |
| Age (linear)                          |                          |                  |          |                          |                  |          | 0.06                     | 0.01 –<br>0.10   | 0.010    |
| <b>Random Effects</b>                 |                          |                  |          |                          |                  |          |                          |                  |          |
| $\sigma^2$                            | 40.94                    |                  |          | 40.89                    |                  |          | 40.44                    |                  |          |
| $\tau_{00}$                           | 33.64 <sub>subject</sub> |                  |          | 33.46 <sub>subject</sub> |                  |          | 30.97 <sub>subject</sub> |                  |          |
| ICC                                   | 0.45                     |                  |          | 0.45                     |                  |          | 0.43                     |                  |          |
| N                                     | 51 <sub>subject</sub>    |                  |          | 51 <sub>subject</sub>    |                  |          | 51 <sub>subject</sub>    |                  |          |
| Obs.                                  | 241                      |                  |          | 241                      |                  |          | 241                      |                  |          |
| R <sup>2</sup> : Margin. /<br>Condit. | 0.000 / 0.451            |                  |          | 0.016 / 0.459            |                  |          | 0.043 / 0.458            |                  |          |

Table S27. Depressive Symptoms - All Visits - All Transitioners - Not Age Adjusted – Models D - F

| <i>Predictors</i>                     | <b>Model D</b>   |                  |          | <b>Model E</b>   |                  |          | <b>Model F</b>   |                  |          |
|---------------------------------------|------------------|------------------|----------|------------------|------------------|----------|------------------|------------------|----------|
|                                       | <i>Estimates</i> | <i>CI</i>        | <i>p</i> | <i>Estimates</i> | <i>CI</i>        | <i>p</i> | <i>Estimates</i> | <i>CI</i>        | <i>p</i> |
| Intercept                             | 53.00            | 50.81 –<br>55.18 | <0.001   | 53.92            | 51.91 –<br>55.94 | <0.001   | 53.45            | 51.10 –<br>55.80 | <0.001   |
| Social Transition<br>Status           | -1.88            | -4.10 –<br>0.34  | 0.097    | -2.06            | -4.28 –<br>0.15  | 0.068    | -1.97            | -4.20 –<br>0.26  | 0.083    |
| Age (linear)                          | 0.05             | 0.01 –<br>0.10   | 0.017    | 0.06             | 0.02 –<br>0.10   | 0.007    | 0.06             | 0.01 –<br>0.10   | 0.011    |
| Gender                                | -1.70            | -6.03 –<br>2.62  | 0.433    |                  |                  |          | -1.72            | -6.05 –<br>2.62  | 0.431    |
| Age (quadratic)                       |                  |                  |          | -0.00            | -0.00 –<br>0.00  | 0.308    | -0.00            | -0.00 –<br>0.00  | 0.306    |
| <b>Random Effects</b>                 |                  |                  |          |                  |                  |          |                  |                  |          |
| $\sigma^2$                            | 40.42            |                  |          | 40.39            |                  |          | 40.37            |                  |          |
| $\tau_{00}$                           | 31.39            | subject          |          | 31.14            | subject          |          | 31.55            | subject          |          |
| ICC                                   | 0.44             |                  |          | 0.44             |                  |          | 0.44             |                  |          |
| N                                     | 51               | subject          |          | 51               | subject          |          | 51               | subject          |          |
| Obs.                                  | 241              |                  |          | 241              |                  |          | 241              |                  |          |
| R <sup>2</sup> : Margin. /<br>Condit. | 0.051 / 0.466    |                  |          | 0.048 / 0.462    |                  |          | 0.055 / 0.469    |                  |          |

Table S28. Depressive Symptoms - All Visits - All Transitioners - Age Adjusted – Models A - C

| <i>Predictors</i>                     | <b>Model A</b>           |                  |          | <b>Model B</b>           |                  |          | <b>Model C</b>           |                  |          |
|---------------------------------------|--------------------------|------------------|----------|--------------------------|------------------|----------|--------------------------|------------------|----------|
|                                       | <i>Estimates</i>         | <i>CI</i>        | <i>p</i> | <i>Estimates</i>         | <i>CI</i>        | <i>p</i> | <i>Estimates</i>         | <i>CI</i>        | <i>p</i> |
| Intercept                             | 54.57                    | 52.76 –<br>56.38 | <0.001   | 54.10                    | 51.95 –<br>56.25 | <0.001   | 54.67                    | 52.84 –<br>56.49 | <0.001   |
| Social Transition<br>Status           | -2.64                    | -4.51 –<br>-0.77 | 0.006    | -2.64                    | -4.51 –<br>-0.77 | 0.006    | -3.24                    | -5.50 –<br>-0.99 | 0.005    |
| Gender                                |                          |                  |          | -1.74                    | -6.00 –<br>2.52  | 0.416    |                          |                  |          |
| Age (linear)                          |                          |                  |          |                          |                  |          | 0.02                     | -0.02 –<br>0.06  | 0.348    |
| <b>Random Effects</b>                 |                          |                  |          |                          |                  |          |                          |                  |          |
| $\sigma^2$                            | 42.81                    |                  |          | 42.78                    |                  |          | 42.77                    |                  |          |
| $\tau_{00}$                           | 30.43 <sub>subject</sub> |                  |          | 30.79 <sub>subject</sub> |                  |          | 30.65 <sub>subject</sub> |                  |          |
| ICC                                   | 0.42                     |                  |          | 0.42                     |                  |          | 0.42                     |                  |          |
| N                                     | 51 <sub>subject</sub>    |                  |          | 51 <sub>subject</sub>    |                  |          | 51 <sub>subject</sub>    |                  |          |
| Obs.                                  | 241                      |                  |          | 241                      |                  |          | 241                      |                  |          |
| R <sup>2</sup> : Margin. /<br>Condit. | 0.020 / 0.427            |                  |          | 0.027 / 0.434            |                  |          | 0.028 / 0.434            |                  |          |

Table S29. Depressive Symptoms - All Visits - All Transitioners - Age Adjusted – Models D - F

| <i>Predictors</i>                     | <b>Model D</b>           |                  |          | <b>Model E</b>           |                  |          | <b>Model F</b>           |                  |          |
|---------------------------------------|--------------------------|------------------|----------|--------------------------|------------------|----------|--------------------------|------------------|----------|
|                                       | <i>Estimates</i>         | <i>CI</i>        | <i>p</i> | <i>Estimates</i>         | <i>CI</i>        | <i>p</i> | <i>Estimates</i>         | <i>CI</i>        | <i>p</i> |
| Intercept                             | 54.27                    | 52.07 –<br>56.47 | <0.001   | 53.67                    | 51.65 –<br>55.68 | <0.001   | 53.28                    | 50.93 –<br>55.63 | <0.001   |
| Social Transition<br>Status           | -3.17                    | -5.44 –<br>-0.89 | 0.007    | -3.05                    | -5.29 –<br>-0.80 | 0.008    | -2.97                    | -5.23 –<br>-0.71 | 0.010    |
| Age (linear)                          | 0.02                     | -0.03 –<br>0.06  | 0.420    | 0.01                     | -0.03 –<br>0.06  | 0.591    | 0.01                     | -0.03 –<br>0.05  | 0.678    |
| Gender                                | -1.43                    | -5.77 –<br>2.91  | 0.511    |                          |                  |          | -1.41                    | -5.73 –<br>2.91  | 0.516    |
| Age (quadratic)                       |                          |                  |          | 0.00                     | 0.00 –<br>0.00   | 0.028    | 0.00                     | 0.00 –<br>0.00   | 0.028    |
| <b>Random Effects</b>                 |                          |                  |          |                          |                  |          |                          |                  |          |
| $\sigma^2$                            | 42.77                    |                  |          | 42.04                    |                  |          | 42.03                    |                  |          |
| $\tau_{00}$                           | 31.14 <sub>subject</sub> |                  |          | 30.35 <sub>subject</sub> |                  |          | 30.86 <sub>subject</sub> |                  |          |
| ICC                                   | 0.42                     |                  |          | 0.42                     |                  |          | 0.42                     |                  |          |
| N                                     | 51 <sub>subject</sub>    |                  |          | 51 <sub>subject</sub>    |                  |          | 51 <sub>subject</sub>    |                  |          |
| Obs.                                  | 241                      |                  |          | 241                      |                  |          | 241                      |                  |          |
| R <sup>2</sup> : Margin. /<br>Condit. | 0.033 / 0.440            |                  |          | 0.042 / 0.444            |                  |          | 0.047 / 0.450            |                  |          |

Table S30. Depressive Symptoms - All Visits - Single Transitioners - Not Age Adjusted – Models A - C

| <i>Predictors</i>                     | <b>Model A</b>           |                  |          | <b>Model B</b>           |                  |          | <b>Model C</b>           |                  |          |
|---------------------------------------|--------------------------|------------------|----------|--------------------------|------------------|----------|--------------------------|------------------|----------|
|                                       | <i>Estimates</i>         | <i>CI</i>        | <i>p</i> | <i>Estimates</i>         | <i>CI</i>        | <i>p</i> | <i>Estimates</i>         | <i>CI</i>        | <i>p</i> |
| Intercept                             | 53.13                    | 51.19 –<br>55.06 | <0.001   | 52.38                    | 50.08 –<br>54.69 | <0.001   | 53.41                    | 51.50 –<br>55.31 | <0.001   |
| Social Transition<br>Status           | -0.93                    | -2.80 –<br>0.94  | 0.329    | -0.93                    | -2.80 –<br>0.94  | 0.329    | -2.50                    | -4.76 –<br>-0.24 | 0.030    |
| Gender                                |                          |                  |          | -2.70                    | -7.28 –<br>1.88  | 0.242    |                          |                  |          |
| Age (linear)                          |                          |                  |          |                          |                  |          | 0.05                     | 0.01 –<br>0.10   | 0.018    |
| <b>Random Effects</b>                 |                          |                  |          |                          |                  |          |                          |                  |          |
| $\sigma^2$                            | 39.21                    |                  |          | 39.17                    |                  |          | 38.73                    |                  |          |
| $\tau_{00}$                           | 34.25 <sub>subject</sub> |                  |          | 34.06 <sub>subject</sub> |                  |          | 32.12 <sub>subject</sub> |                  |          |
| ICC                                   | 0.47                     |                  |          | 0.47                     |                  |          | 0.45                     |                  |          |
| N                                     | 48 <sub>subject</sub>    |                  |          | 48 <sub>subject</sub>    |                  |          | 48 <sub>subject</sub>    |                  |          |
| Obs.                                  | 224                      |                  |          | 224                      |                  |          | 224                      |                  |          |
| R <sup>2</sup> : Margin. /<br>Condit. | 0.003 / 0.468            |                  |          | 0.019 / 0.475            |                  |          | 0.043 / 0.477            |                  |          |

Table S31. Depressive Symptoms - All Visits - Single Transitioners - Not Age Adjusted – Models D - F

| <i>Predictors</i>                     | <b>Model D</b>           |                  |          | <b>Model E</b>           |                  |          | <b>Model F</b>           |                  |          |
|---------------------------------------|--------------------------|------------------|----------|--------------------------|------------------|----------|--------------------------|------------------|----------|
|                                       | <i>Estimates</i>         | <i>CI</i>        | <i>p</i> | <i>Estimates</i>         | <i>CI</i>        | <i>p</i> | <i>Estimates</i>         | <i>CI</i>        | <i>p</i> |
| Intercept                             | 52.86                    | 50.56 –<br>55.17 | <0.001   | 53.77                    | 51.68 –<br>55.87 | <0.001   | 53.23                    | 50.77 –<br>55.69 | <0.001   |
| Social Transition<br>Status           | -2.41                    | -4.68 –<br>-0.14 | 0.037    | -2.56                    | -4.82 –<br>-0.29 | 0.027    | -2.47                    | -4.74 –<br>-0.19 | 0.034    |
| Age (linear)                          | 0.05                     | 0.01 –<br>0.09   | 0.027    | 0.06                     | 0.01 –<br>0.10   | 0.014    | 0.05                     | 0.01 –<br>0.10   | 0.021    |
| Gender                                | -1.91                    | -6.45 –<br>2.64  | 0.403    |                          |                  |          | -1.93                    | -6.48 –<br>2.62  | 0.398    |
| Age (quadratic)                       |                          |                  |          | -0.00                    | -0.00 –<br>0.00  | 0.419    | -0.00                    | -0.00 –<br>0.00  | 0.413    |
| <b>Random Effects</b>                 |                          |                  |          |                          |                  |          |                          |                  |          |
| $\sigma^2$                            | 38.71                    |                  |          | 38.75                    |                  |          | 38.74                    |                  |          |
| $\tau_{00}$                           | 32.46 <sub>subject</sub> |                  |          | 32.30 <sub>subject</sub> |                  |          | 32.62 <sub>subject</sub> |                  |          |
| ICC                                   | 0.46                     |                  |          | 0.45                     |                  |          | 0.46                     |                  |          |
| N                                     | 48 <sub>subject</sub>    |                  |          | 48 <sub>subject</sub>    |                  |          | 48 <sub>subject</sub>    |                  |          |
| Obs.                                  | 224                      |                  |          | 224                      |                  |          | 224                      |                  |          |
| R <sup>2</sup> : Margin. /<br>Condit. | 0.051 / 0.484            |                  |          | 0.046 / 0.480            |                  |          | 0.054 / 0.487            |                  |          |

Table S32. Depressive Symptoms - All Visits - Single Transitioners - Age Adjusted – Models A - C

| <i>Predictors</i>                     | <b>Model A</b>           |                  |          | <b>Model B</b>           |                  |          | <b>Model C</b>           |                  |          |
|---------------------------------------|--------------------------|------------------|----------|--------------------------|------------------|----------|--------------------------|------------------|----------|
|                                       | <i>Estimates</i>         | <i>CI</i>        | <i>p</i> | <i>Estimates</i>         | <i>CI</i>        | <i>p</i> | <i>Estimates</i>         | <i>CI</i>        | <i>p</i> |
| Intercept                             | 54.28                    | 52.40 –<br>56.16 | <0.001   | 53.71                    | 51.46 –<br>55.96 | <0.001   | 54.39                    | 52.49 –<br>56.29 | <0.001   |
| Social Transition<br>Status           | -2.65                    | -4.58 –<br>-0.72 | 0.007    | -2.65                    | -4.58 –<br>-0.72 | 0.007    | -3.22                    | -5.56 –<br>-0.89 | 0.007    |
| Gender                                |                          |                  |          | -2.08                    | -6.54 –<br>2.39  | 0.355    |                          |                  |          |
| Age (linear)                          |                          |                  |          |                          |                  |          | 0.02                     | -0.02 –<br>0.06  | 0.387    |
| <b>Random Effects</b>                 |                          |                  |          |                          |                  |          |                          |                  |          |
| $\sigma^2$                            | 42.00                    |                  |          | 41.98                    |                  |          | 41.99                    |                  |          |
| $\tau_{00}$                           | 31.08 <sub>subject</sub> |                  |          | 31.27 <sub>subject</sub> |                  |          | 31.33 <sub>subject</sub> |                  |          |
| ICC                                   | 0.43                     |                  |          | 0.43                     |                  |          | 0.43                     |                  |          |
| N                                     | 48 <sub>subject</sub>    |                  |          | 48 <sub>subject</sub>    |                  |          | 48 <sub>subject</sub>    |                  |          |
| Obs.                                  | 224                      |                  |          | 224                      |                  |          | 224                      |                  |          |
| R <sup>2</sup> : Margin. /<br>Condit. | 0.021 / 0.437            |                  |          | 0.030 / 0.444            |                  |          | 0.028 / 0.443            |                  |          |



Table S33. Depressive Symptoms - All Visits - Single Transitioners - Age Adjusted – Models D - F

| <i>Predictors</i>                     | <b>Model D</b>           |                  |          | <b>Model E</b>           |                  |          | <b>Model F</b>           |                  |          |
|---------------------------------------|--------------------------|------------------|----------|--------------------------|------------------|----------|--------------------------|------------------|----------|
|                                       | <i>Estimates</i>         | <i>CI</i>        | <i>p</i> | <i>Estimates</i>         | <i>CI</i>        | <i>p</i> | <i>Estimates</i>         | <i>CI</i>        | <i>p</i> |
| Intercept                             | 53.87                    | 51.57 –<br>56.18 | <0.001   | 53.49                    | 51.40 –<br>55.59 | <0.001   | 53.00                    | 50.54 –<br>55.46 | <0.001   |
| Social Transition<br>Status           | -3.14                    | -5.48 –<br>-0.79 | 0.009    | -3.10                    | -5.42 –<br>-0.77 | 0.009    | -3.01                    | -5.35 –<br>-0.68 | 0.012    |
| Age (linear)                          | 0.02                     | -0.03 –<br>0.06  | 0.468    | 0.01                     | -0.03 –<br>0.06  | 0.581    | 0.01                     | -0.04 –<br>0.05  | 0.671    |
| Gender                                | -1.82                    | -6.36 –<br>2.73  | 0.426    |                          |                  |          | -1.75                    | -6.27 –<br>2.76  | 0.439    |
| Age (quadratic)                       |                          |                  |          | 0.00                     | -0.00 –<br>0.00  | 0.056    | 0.00                     | -0.00 –<br>0.00  | 0.058    |
| <b>Random Effects</b>                 |                          |                  |          |                          |                  |          |                          |                  |          |
| $\sigma^2$                            | 41.99                    |                  |          | 41.50                    |                  |          | 41.49                    |                  |          |
| $\tau_{00}$                           | 31.66 <sub>subject</sub> |                  |          | 30.91 <sub>subject</sub> |                  |          | 31.29 <sub>subject</sub> |                  |          |
| ICC                                   | 0.43                     |                  |          | 0.43                     |                  |          | 0.43                     |                  |          |
| N                                     | 48 <sub>subject</sub>    |                  |          | 48 <sub>subject</sub>    |                  |          | 48 <sub>subject</sub>    |                  |          |
| Obs.                                  | 224                      |                  |          | 224                      |                  |          | 224                      |                  |          |
| R <sup>2</sup> : Margin. /<br>Condit. | 0.035 / 0.450            |                  |          | 0.039 / 0.449            |                  |          | 0.046 / 0.456            |                  |          |

Visit-Type Effect - Specific Model Results. We present a multiverse analysis of visit-type-related mental health change in this article's main text. Here, we include the model results for all models included in the main text and the Figure 3 Forest Plot.

Table S34. Anxiety - Pre-COVID Visits - All Transitioners

| <i>Predictors</i>                  | <b>Not Age Adjusted</b>  |               |          | <b>Age Adjusted</b>      |               |          |
|------------------------------------|--------------------------|---------------|----------|--------------------------|---------------|----------|
|                                    | <i>Estimates</i>         | <i>CI</i>     | <i>p</i> | <i>Estimates</i>         | <i>CI</i>     | <i>p</i> |
| Intercept                          | 53.82                    | 52.06 – 55.58 | <0.001   | 54.39                    | 52.63 – 56.15 | <0.001   |
| Pre-Transition Comparison          | 1.72                     | -1.49 – 4.92  | 0.293    | 2.26                     | -0.95 – 5.48  | 0.166    |
| Post-Transition Comparison         | -0.46                    | -3.44 – 2.52  | 0.760    | -0.70                    | -3.68 – 2.29  | 0.645    |
| Age (linear)                       | 0.02                     | -0.02 – 0.05  | 0.394    | -0.01                    | -0.04 – 0.02  | 0.574    |
| <b>Random Effects</b>              |                          |               |          |                          |               |          |
| $\sigma^2$                         | 44.03                    |               |          | 44.15                    |               |          |
| $\tau_{00}$                        | 47.46 <sub>subject</sub> |               |          | 47.63 <sub>subject</sub> |               |          |
| ICC                                | 0.52                     |               |          | 0.52                     |               |          |
| N                                  | 131 <sub>subject</sub>   |               |          | 131 <sub>subject</sub>   |               |          |
| Obs.                               | 430                      |               |          | 430                      |               |          |
| R <sup>2</sup> : Margin. / Condit. | 0.007 / 0.522            |               |          | 0.013 / 0.525            |               |          |

Table S35. Anxiety - Pre-COVID Visits - Single Transitioners

| <i>Predictors</i>                  | <b>Not Age Adjusted</b>  |               |          | <b>Age Adjusted</b>      |               |          |
|------------------------------------|--------------------------|---------------|----------|--------------------------|---------------|----------|
|                                    | <i>Estimates</i>         | <i>CI</i>     | <i>p</i> | <i>Estimates</i>         | <i>CI</i>     | <i>p</i> |
| Intercept                          | 53.84                    | 52.07 – 55.62 | <0.001   | 54.39                    | 52.61 – 56.17 | <0.001   |
| Pre-Transition Comparison          | 2.13                     | -1.18 – 5.43  | 0.205    | 2.56                     | -0.75 – 5.87  | 0.129    |
| Post-Transition Comparison         | -0.67                    | -3.75 – 2.41  | 0.669    | -0.83                    | -3.92 – 2.25  | 0.595    |
| Age (linear)                       | 0.01                     | -0.02 – 0.05  | 0.425    | -0.01                    | -0.05 – 0.03  | 0.573    |
| <b>Random Effects</b>              |                          |               |          |                          |               |          |
| $\sigma^2$                         | 42.08                    |               |          | 42.80                    |               |          |
| $\tau_{00}$                        | 49.41 <sub>subject</sub> |               |          | 49.38 <sub>subject</sub> |               |          |
| ICC                                | 0.54                     |               |          | 0.54                     |               |          |
| N                                  | 128 <sub>subject</sub>   |               |          | 128 <sub>subject</sub>   |               |          |
| Obs.                               | 416                      |               |          | 416                      |               |          |
| R <sup>2</sup> : Margin. / Condit. | 0.009 / 0.544            |               |          | 0.015 / 0.543            |               |          |

Table S36. Anxiety - All Visits - All Transitioners

| <i>Predictors</i>                  | <b>Not Age Adjusted</b>  |               |          | <b>Age Adjusted</b>      |               |          |
|------------------------------------|--------------------------|---------------|----------|--------------------------|---------------|----------|
|                                    | <i>Estimates</i>         | <i>CI</i>     | <i>p</i> | <i>Estimates</i>         | <i>CI</i>     | <i>p</i> |
| Intercept                          | 54.13                    | 52.46 – 55.80 | <0.001   | 54.59                    | 52.92 – 56.27 | <0.001   |
| Pre-Transition Comparison          | 1.93                     | -1.17 – 5.02  | 0.221    | 2.52                     | -0.57 – 5.62  | 0.110    |
| Post-Transition Comparison         | -0.92                    | -3.70 – 1.86  | 0.514    | -1.09                    | -3.87 – 1.70  | 0.441    |
| Age (linear)                       | 0.02                     | -0.01 – 0.05  | 0.233    | -0.00                    | -0.03 – 0.03  | 0.798    |
| <b>Random Effects</b>              |                          |               |          |                          |               |          |
| $\sigma^2$                         | 51.40                    |               |          | 50.62                    |               |          |
| $\tau_{00}$                        | 43.80 <sub>subject</sub> |               |          | 44.41 <sub>subject</sub> |               |          |
| ICC                                | 0.46                     |               |          | 0.47                     |               |          |
| N                                  | 137 <sub>subject</sub>   |               |          | 137 <sub>subject</sub>   |               |          |
| Obs.                               | 529                      |               |          | 529                      |               |          |
| R <sup>2</sup> : Margin. / Condit. | 0.010 / 0.465            |               |          | 0.014 / 0.475            |               |          |

Table S37. Anxiety - All Visits - Single Transitioners

| <i>Predictors</i>                  | <b>Not Age Adjusted</b>  |               |          | <b>Age Adjusted</b>      |               |          |
|------------------------------------|--------------------------|---------------|----------|--------------------------|---------------|----------|
|                                    | <i>Estimates</i>         | <i>CI</i>     | <i>p</i> | <i>Estimates</i>         | <i>CI</i>     | <i>p</i> |
| Intercept                          | 54.15                    | 52.46 – 55.84 | <0.001   | 54.60                    | 52.91 – 56.29 | <0.001   |
| Pre-Transition Comparison          | 2.35                     | -0.83 – 5.53  | 0.146    | 2.83                     | -0.35 – 6.02  | 0.081    |
| Post-Transition Comparison         | -1.12                    | -3.98 – 1.74  | 0.441    | -1.23                    | -4.10 – 1.64  | 0.398    |
| Age (linear)                       | 0.02                     | -0.01 – 0.05  | 0.223    | -0.00                    | -0.03 – 0.03  | 0.836    |
| <b>Random Effects</b>              |                          |               |          |                          |               |          |
| $\sigma^2$                         | 50.25                    |               |          | 49.85                    |               |          |
| $\tau_{00}$                        | 45.27 <sub>subject</sub> |               |          | 45.83 <sub>subject</sub> |               |          |
| ICC                                | 0.47                     |               |          | 0.48                     |               |          |
| N                                  | 134 <sub>subject</sub>   |               |          | 134 <sub>subject</sub>   |               |          |
| Obs.                               | 512                      |               |          | 512                      |               |          |
| R <sup>2</sup> : Margin. / Condit. | 0.013 / 0.481            |               |          | 0.017 / 0.488            |               |          |

Table S38. Depressive Symptoms - Pre-COVID Visits - All Transitioners

| <i>Predictors</i>                  | <b>Not Age Adjusted</b>  |               |          | <b>Age Adjusted</b>      |               |          |
|------------------------------------|--------------------------|---------------|----------|--------------------------|---------------|----------|
|                                    | <i>Estimates</i>         | <i>CI</i>     | <i>p</i> | <i>Estimates</i>         | <i>CI</i>     | <i>p</i> |
| Intercept                          | 52.77                    | 51.14 – 54.40 | <0.001   | 53.49                    | 51.83 – 55.14 | <0.001   |
| Pre-Transition Comparison          | 2.04                     | -0.92 – 5.00  | 0.175    | 3.23                     | 0.22 – 6.24   | 0.036    |
| Post-Transition Comparison         | -0.30                    | -3.03 – 2.42  | 0.826    | -0.56                    | -3.33 – 2.21  | 0.690    |
| Age (linear)                       | 0.05                     | 0.02 – 0.09   | 0.001    | 0.02                     | -0.01 – 0.05  | 0.273    |
| <b>Random Effects</b>              |                          |               |          |                          |               |          |
| $\sigma^2$                         | 39.62                    |               |          | 42.38                    |               |          |
| $\tau_{00}$                        | 39.72 <sub>subject</sub> |               |          | 40.38 <sub>subject</sub> |               |          |
| ICC                                | 0.50                     |               |          | 0.49                     |               |          |
| N                                  | 132 <sub>subject</sub>   |               |          | 132 <sub>subject</sub>   |               |          |
| Obs.                               | 436                      |               |          | 436                      |               |          |
| R <sup>2</sup> : Margin. / Condit. | 0.041 / 0.521            |               |          | 0.020 / 0.498            |               |          |

Table S39. Depressive Symptoms - Pre-COVID Visits - Single Transitioners

| <i>Predictors</i>                  | <b>Not Age Adjusted</b>  |               |          | <b>Age Adjusted</b>      |               |          |
|------------------------------------|--------------------------|---------------|----------|--------------------------|---------------|----------|
|                                    | <i>Estimates</i>         | <i>CI</i>     | <i>p</i> | <i>Estimates</i>         | <i>CI</i>     | <i>p</i> |
| Intercept                          | 52.82                    | 51.18 – 54.46 | <0.001   | 53.50                    | 51.84 – 55.17 | <0.001   |
| Pre-Transition Comparison          | 2.28                     | -0.77 – 5.33  | 0.142    | 2.96                     | -0.15 – 6.07  | 0.062    |
| Post-Transition Comparison         | -0.63                    | -3.45 – 2.18  | 0.657    | -0.74                    | -3.60 – 2.12  | 0.609    |
| Age (linear)                       | 0.06                     | 0.02 – 0.09   | 0.001    | 0.02                     | -0.01 – 0.05  | 0.223    |
| <b>Random Effects</b>              |                          |               |          |                          |               |          |
| $\sigma^2$                         | 38.61                    |               |          | 41.99                    |               |          |
| $\tau_{00}$                        | 41.06 <sub>subject</sub> |               |          | 41.62 <sub>subject</sub> |               |          |
| ICC                                | 0.52                     |               |          | 0.50                     |               |          |
| N                                  | 129 <sub>subject</sub>   |               |          | 129 <sub>subject</sub>   |               |          |
| Obs.                               | 422                      |               |          | 422                      |               |          |
| R <sup>2</sup> : Margin. / Condit. | 0.045 / 0.537            |               |          | 0.019 / 0.507            |               |          |

Table S40. Depressive Symptoms - All Visits - All Transitioners

| <i>Predictors</i>                  | <b>Not Age Adjusted</b>  |               |          | <b>Age Adjusted</b>      |               |          |
|------------------------------------|--------------------------|---------------|----------|--------------------------|---------------|----------|
|                                    | <i>Estimates</i>         | <i>CI</i>     | <i>p</i> | <i>Estimates</i>         | <i>CI</i>     | <i>p</i> |
| Intercept                          | 53.29                    | 51.74 – 54.83 | <0.001   | 53.87                    | 52.29 – 55.44 | <0.001   |
| Pre-Transition Comparison          | 1.57                     | -1.27 – 4.41  | 0.278    | 2.80                     | -0.09 – 5.69  | 0.058    |
| Post-Transition Comparison         | -0.55                    | -3.09 – 2.00  | 0.673    | -0.76                    | -3.34 – 1.83  | 0.564    |
| Age (linear)                       | 0.06                     | 0.03 – 0.09   | <0.001   | 0.03                     | 0.00 – 0.06   | 0.024    |
| <b>Random Effects</b>              |                          |               |          |                          |               |          |
| $\sigma^2$                         | 43.30                    |               |          | 45.15                    |               |          |
| $\tau_{00}$                        | 37.75 <sub>subject</sub> |               |          | 38.74 <sub>subject</sub> |               |          |
| ICC                                | 0.47                     |               |          | 0.46                     |               |          |
| N                                  | 138 <sub>subject</sub>   |               |          | 138 <sub>subject</sub>   |               |          |
| Obs.                               | 536                      |               |          | 536                      |               |          |
| R <sup>2</sup> : Margin. / Condit. | 0.047 / 0.491            |               |          | 0.022 / 0.473            |               |          |



Table S41. Depressive Symptoms - All Visits - Single Transitioners

| <i>Predictors</i>                  | <b>Not Age Adjusted</b>  |               |          | <b>Age Adjusted</b>      |               |          |
|------------------------------------|--------------------------|---------------|----------|--------------------------|---------------|----------|
|                                    | <i>Estimates</i>         | <i>CI</i>     | <i>p</i> | <i>Estimates</i>         | <i>CI</i>     | <i>p</i> |
| Intercept                          | 53.33                    | 51.78 – 54.88 | <0.001   | 53.89                    | 52.31 – 55.46 | <0.001   |
| Pre-Transition Comparison          | 1.75                     | -1.16 – 4.67  | 0.237    | 2.50                     | -0.46 – 5.46  | 0.098    |
| Post-Transition Comparison         | -0.98                    | -3.59 – 1.63  | 0.460    | -1.07                    | -3.73 – 1.58  | 0.425    |
| Age (linear)                       | 0.06                     | 0.03 – 0.09   | <0.001   | 0.03                     | 0.00 – 0.06   | 0.025    |
| <b>Random Effects</b>              |                          |               |          |                          |               |          |
| $\sigma^2$                         | 42.63                    |               |          | 44.88                    |               |          |
| $\tau_{00}$                        | 38.43 <sub>subject</sub> |               |          | 39.27 <sub>subject</sub> |               |          |
| ICC                                | 0.47                     |               |          | 0.47                     |               |          |
| N                                  | 135 <sub>subject</sub>   |               |          | 135 <sub>subject</sub>   |               |          |
| Obs.                               | 519                      |               |          | 519                      |               |          |
| R <sup>2</sup> : Margin. / Condit. | 0.049 / 0.500            |               |          | 0.021 / 0.478            |               |          |
